# Supplementary material for: Non-substrate based, small molecule inhibitors of the human isoprenylcysteine carboxyl methyltransferase
Source: Royal Society of Chemistry journal article supplement (doi:10.1039/c6md00130k), 2016-01-01
Supplement: c6md00130k1.pdf [file c6md00130k1.pdf]

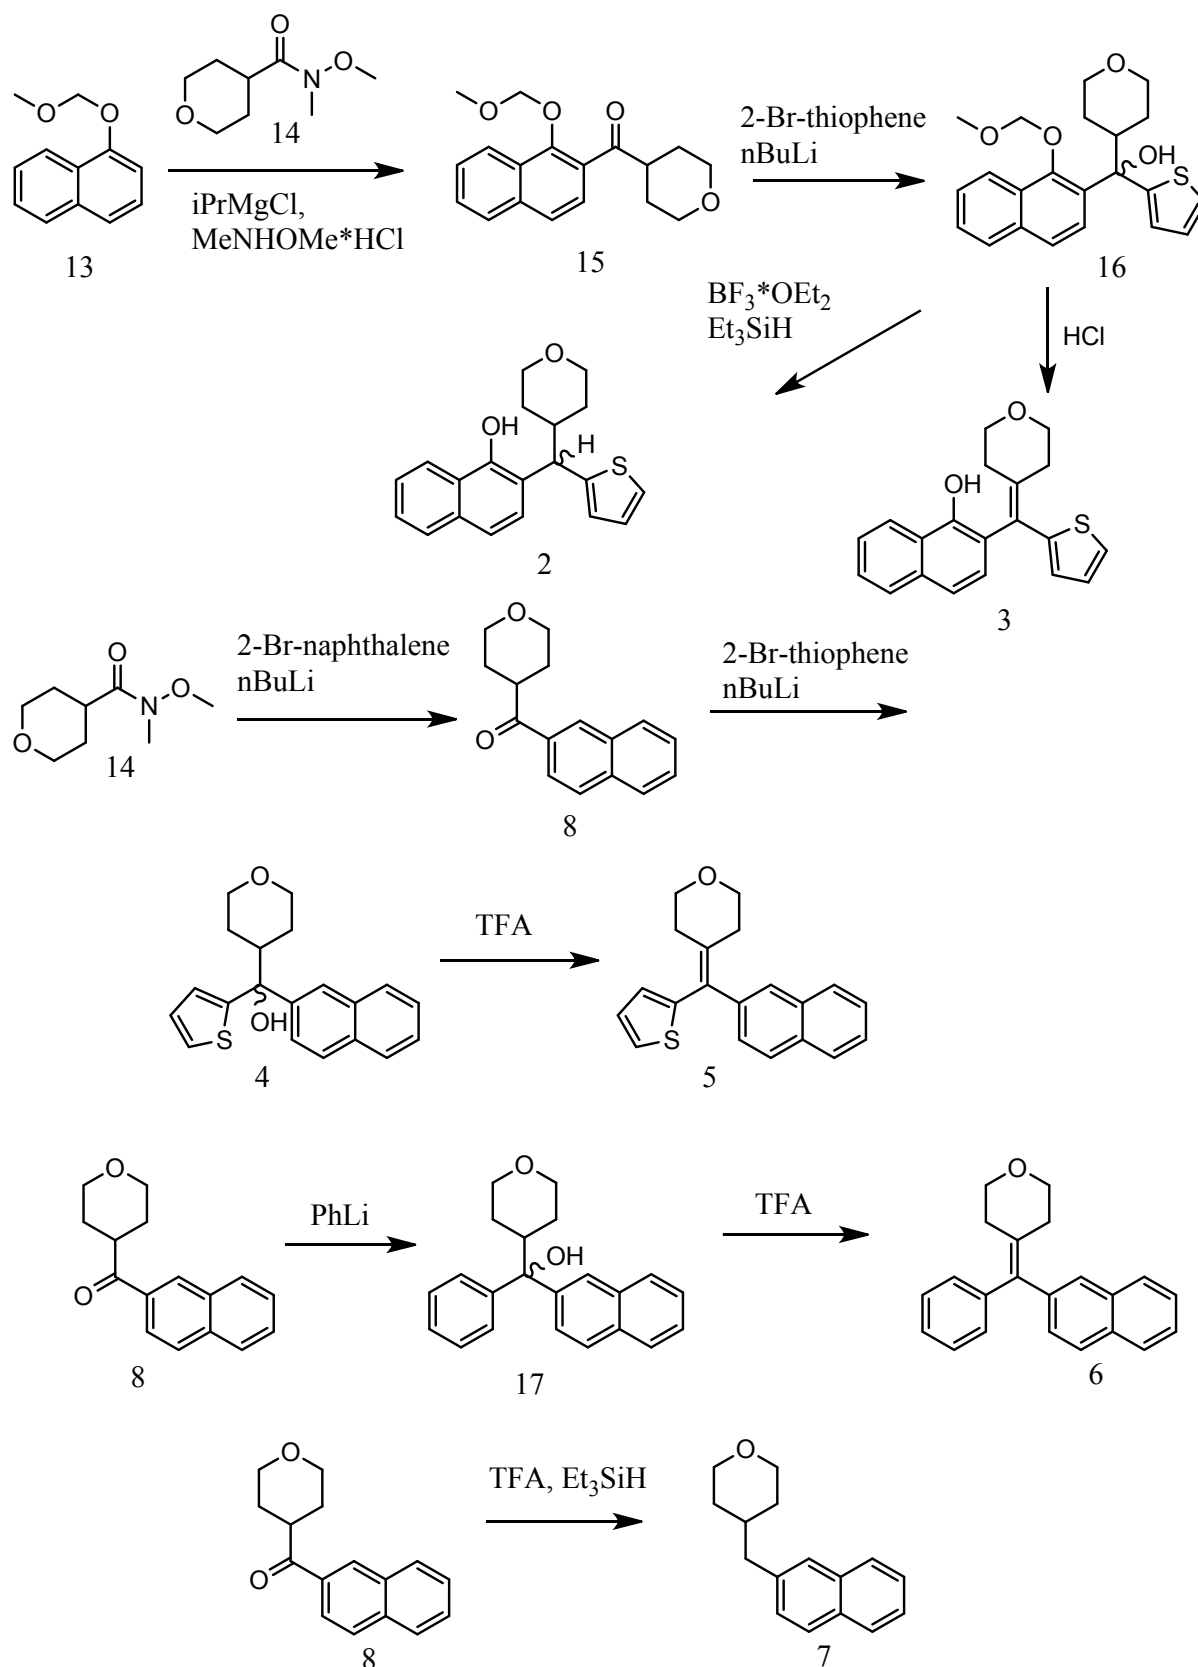

**Fig. S1:** Synthesis of compounds 2-8. see synthetic methods section for details

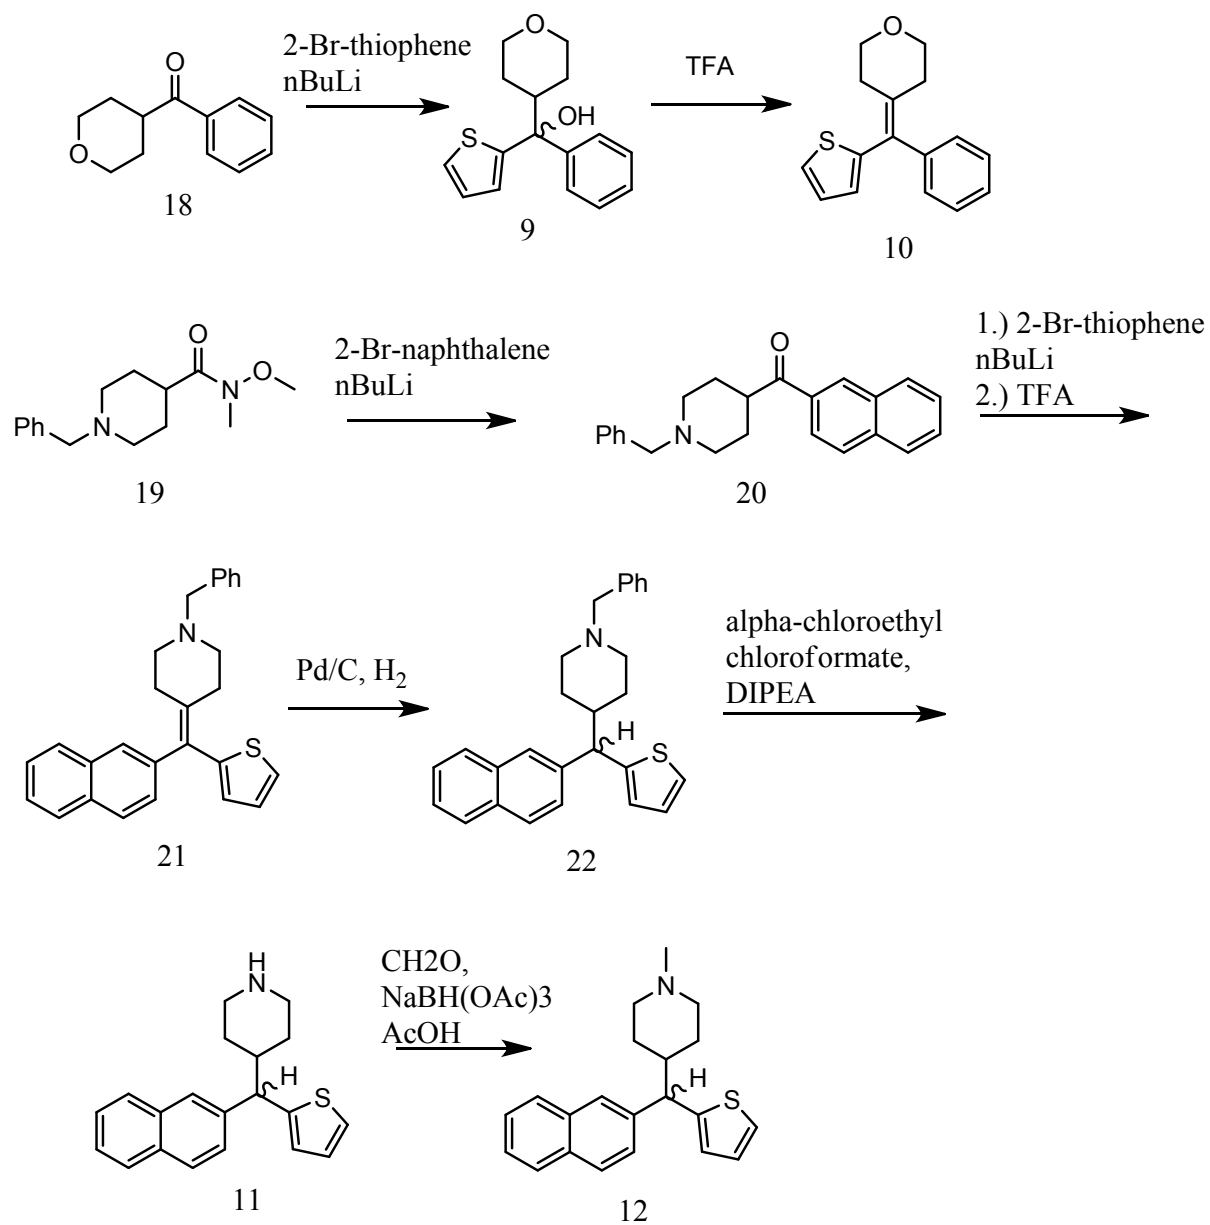

**Fig. S2:** Synthesis of compounds 9-12. see synthetic methods section for details
